# Supplementary material
Source: MDPI journal article supplement (https://www.mdpi.com/2071-1050/11/3/699)
Supplement: s1 [file s1]

SUPPLEMENTARY MATERIALS

# An Empirical Comparison of Machine-Learning Methods on Bank Client Credit Assessments

Lkhagvadorj Munkhdalai, Tsendsuren Munkhdalai, Oyun-Erdene Namsrai, Jong Yun Lee and Keun Ho Ryu

**Table 1.** Selected variables by TSFFS method and their average random forest importance.

| Number | Selected Variables | Description                                                                                                                   | Average RF importance | Rank |
|--------|--------------------|-------------------------------------------------------------------------------------------------------------------------------|-----------------------|------|
| 1      | LEVRATIO           | Ratio of total debt to total assets                                                                                           | 11.90                 | 1    |
| 2      | FIN                | Total value of financial assets held by household, 2013 dollars                                                               | 10.40                 | 2    |
| 3      | VEHIC              | Total value of all vehicles held by household, 2013 dollars                                                                   | 6.89                  | 3    |
| 4      | AGE                | Age of head of household                                                                                                      | 5.85                  | 4    |
| 5      | FEARDENIAL         | Household feared being denied credit in the past 5 years                                                                      | 5.81                  | 5    |
| 6      | TPAY               | Total value of monthly debt payments, 2013 dollars                                                                            | 5.11                  | 6    |
| 7      | KGTOTAL            | Total unrealized capital gains or losses for the household, 2013 dollars                                                      | 4.98                  | 7    |
| 8      | CHECKING           | Total value of checking accounts held by household, 2013 dollars                                                              | 4.67                  | 8    |
| 9      | WAGEINC            | Wage and salary income, 2013 dollars                                                                                          | 4.31                  | 9    |
| 10     | INSTALL            | Total value of installment loans held by household, 2013 dollars                                                              | 4.29                  | 10   |
| 11     | CONSPAY            | total monthly consumer debt payments, 2013 dollars                                                                            | 4.26                  | 11   |
| 12     | REVPAY             | total monthly revolving debt payments, 2013 dollars                                                                           | 4.10                  | 12   |
| 13     | EDN_INST           | Total value of education loans held by household, 2013 dollars                                                                | 3.91                  | 13   |
| 14     | LLOAN8             | Total balance of household loans where the lender is an other nonfinancial, 2013 dollars                                      | 3.71                  | 14   |
| 15     | SAVING             | Total value of savings accounts held by household, 2013 dollars                                                               | 3.50                  | 15   |
| 16     | TRANSFOTHINC       | Unemployment, alimony/child support, TANF/food stamps/SSI, and other income, 2013 dollars                                     | 3.40                  | 16   |
| 17     | KIDS               | Total number of children in household                                                                                         | 3.17                  | 17   |
| 18     | LLOAN4             | Total balance of household loans where the lender is finance, loan or leasing company, or inc debt consolidator, 2013 dollars | 2.96                  | 18   |
| 19     | LLOAN7             | Total balance of household loans where the lender is an individual, 2013 dollars                                              | 2.92                  | 19   |
| 20     | EQUITINC           | ratio of equity to normal income                                                                                              | 2.55                  | 20   |
| 21     | BUSSEFARMINC       | Income from business, sole proprietorship, and farm, 2013 dollars                                                             | 2.33                  | 21   |
| 22     | EDCL               | Education category of head of household                                                                                       | 2.16                  | 22   |
| 23     | WHYNOCKG           | Reason household does not have a checking account                                                                             | 2.14                  | 23   |
| 24     | THRIFT             | Total value of account-type pension plans from R and spouse's current job, 2013 dollars                                       | 2.13                  | 24   |
| 25     | BNKRUPLAST5        | Household has declared bankruptcy in the past 5 years                                                                         | 2.07                  | 25   |
| 26     | ILNPAY             | Total payment of installment loan, 2013 dollars                                                                               | 2.03                  | 26   |
| 27     | TURNDOWN           | Household has been turned down for credit in the past 5 years                                                                 | 1.99                  | 27   |
| 28     | LLOAN1             | Total balance of household loans where the lender is a commercial bank, 2013 dollars                                          | 1.97                  | 28   |

|    |             |                                                                                                                |      |    |
|----|-------------|----------------------------------------------------------------------------------------------------------------|------|----|
| 29 | CASHLI      | Total cash value of whole life insurance held by household, 2013 dollars                                       | 1.82 | 29 |
| 30 | KGHOUSE     | Unrealized capital gains or losses on the primary residence, 2013 dollars                                      | 1.70 | 30 |
| 31 | LLOAN11     | Total balance of household loans where the lender is a pension, 2013 dollars                                   | 1.55 | 31 |
| 32 | NBUSVEH     | Total number of business vehicles held by household                                                            | 1.48 | 32 |
| 33 | OCCAT1      | Occupation categories for head of household                                                                    | 1.36 | 33 |
| 34 | SAVBND      | Total value of savings bonds held by household, 2013 dollars                                                   | 1.32 | 34 |
| 35 | RACE        | Race/ethnicity of respondent                                                                                   | 1.28 | 35 |
| 36 | SAVED       | Indicator of whether the household saved over the past 12 months                                               | 1.22 | 36 |
| 37 | LLOAN6      | Total balance of household loans where the lender is a real estate company, 2013 dollars                       | 1.22 | 37 |
| 38 | LLOAN9      | Total balance of household loans where the lender is government, 2013 dollars                                  | 1.15 | 38 |
| 39 | SAVRES3     | Reason for saving: family                                                                                      | 1.00 | 39 |
| 40 | EHCHKG      | people w/o checking accounts: ever had an account?                                                             | 0.99 | 40 |
| 41 | OTHNFIN     | Total value of other nonfinancial assets held by household, 2013 dollars                                       | 0.99 | 41 |
| 42 | LOCPAY      | Total payment on line of credit, 2013 dollars                                                                  | 0.98 | 42 |
| 43 | ORESRE      | Total value of other residential real estate held by household, 2013 dollars                                   | 0.97 | 43 |
| 44 | PAYILN4     | payments on fourth installment loan, 2013 dollars                                                              | 0.93 | 44 |
| 45 | EDUNUM      | Number of education loan                                                                                       | 0.92 | 45 |
| 46 | MMDA        | money market deposit accounts, 2013 dollars                                                                    | 0.88 | 46 |
| 47 | MINBAL      | Why no checking account: minimum balance is too high                                                           | 0.85 | 47 |
| 48 | SAVRES5     | Reason for saving: purchases                                                                                   | 0.84 | 48 |
| 49 | ISHOPNONE   | Shopping for saving and investments: almost no shopping                                                        | 0.79 | 49 |
| 50 | HHSEX       | Gender of household head                                                                                       | 0.75 | 50 |
| 51 | NSTOCKS     | number different companies in which hold stock                                                                 | 0.70 | 51 |
| 52 | BFRIENDWORK | Information used for borrowing decisions: friends, material from work/business contacts                        | 0.69 | 52 |
| 53 | BMAILADTV   | Information used for borrowing decisions: material in mail, tv, radio, advertisements, telemarketer            | 0.67 | 53 |
| 54 | IFRIENDWORK | Information used for investing decisions: friends, material from work/business contacts                        | 0.65 | 54 |
| 55 | NOFINRISK   | Knowledge of personal finance                                                                                  | 0.64 | 55 |
| 56 | VLEASE      | Total value of leased vehicles held by household, 2013 dollars                                                 | 0.63 | 56 |
| 57 | IDONT       | Information used for investing decisions: never borrow                                                         | 0.59 | 57 |
| 58 | IMAGZNEWS   | Information used for investing decisions: magazines, newspapers, books                                         | 0.58 | 58 |
| 59 | SAVRES1     | Reason for saving: can't save                                                                                  | 0.58 | 59 |
| 60 | SAVRES6     | Reason for saving: retirement                                                                                  | 0.55 | 60 |
| 61 | BFINPRO     | Information used for borrowing decisions: banker, broker, real estate broker, builder, dealer, insurance agent | 0.54 | 61 |
| 62 | IFINPRO     | Information used for investing decisions: banker, broker, real estate broker, builder, dealer, insurance agent | 0.54 | 62 |
| 63 | BFINPLAN    | Information used for borrowing decisions: lawyer, accountant, financial planner                                | 0.54 | 63 |
| 64 | STMUTF      | amount in stock mutual funds, 2013 dollars                                                                     | 0.53 | 64 |
| 65 | PIR40       | Household has a PIR higher than 40%                                                                            | 0.53 | 65 |
| 66 | DONTWANT    | Why no checking account: does not want/need a checking account                                                 | 0.53 | 66 |
| 67 | TRUSTS      | Amount R would receive if they cashed in trusts, 2013 dollars                                                  | 0.50 | 67 |
| 68 | DBPLANCJ    | Either head or spouse/partner has a defined benefit pension on a current job                                   | 0.49 | 68 |

|     |             |                                                                                                      |      |     |
|-----|-------------|------------------------------------------------------------------------------------------------------|------|-----|
| 69  | PAYMORTO    | payments on other loans, 2013 dollars                                                                | 0.48 | 69  |
| 70  | NNRESRE     | Total value of net equity in nonresidential real estate held by household, 2013 dollars              | 0.46 | 70  |
| 71  | LLOAN2      | Total balance of household loans where the lender is saving and loan, 2013 dollars                   | 0.46 | 71  |
| 72  | LLOAN5      | Total balance of household loans where the lender is a brokerage and/or life insurance, 2013 dollars | 0.45 | 72  |
| 73  | COMUTF      | amount in combination and other mutual funds, 2013 dollars                                           | 0.45 | 73  |
| 74  | IFINPLAN    | Information used for investing decisions: lawyer, accountant, financial planner                      | 0.45 | 74  |
| 75  | PAYVEH4     | payments on fourth vehicle, 2013 dollars                                                             | 0.42 | 75  |
| 76  | DONTWRIT    | Why no checking account: don't write enough checks to make it worthwhile                             | 0.42 | 76  |
| 77  | ISELF       | Information used for investing decisions: self, shop around, other personal research                 | 0.42 | 77  |
| 78  | PURCH1      | First lien on primary residence used for purchase of primary residence                               | 0.41 | 78  |
| 79  | MORT2       | Amount owed on mortgage 2, 2013 dollars                                                              | 0.37 | 79  |
| 80  | HASSET      | Do you have any asset                                                                                | 0.36 | 80  |
| 81  | REFIN_EVER  | Refinanced first lien mortgage on primary residence                                                  | 0.35 | 81  |
| 82  | NEWCAR2     | number of car/truck/SUV with model year no older than one year before the survey                     | 0.34 | 82  |
| 83  | NONACTBUS   | Value of non-actively managed business(es), 2013 dollars                                             | 0.33 | 83  |
| 84  | CANTMANG    | Why no checking account: can't manage/balance a checking account                                     | 0.32 | 84  |
| 85  | DONTLIKE    | Why no checking account: don't like dealing with banks                                               | 0.29 | 85  |
| 86  | EOPAY       | Total payment of other vehicles, 2013 dollars                                                        | 0.27 | 86  |
| 87  | SVCCHG      | Why no checking account: service charges are too high                                                | 0.26 | 87  |
| 88  | CKMANYSVCS  | Why chose main checking account institution: able to obtain many services at one place               | 0.26 | 88  |
| 89  | ANNUIT      | Amount R would receive if they cashed in annuities, 2013 dollars                                     | 0.25 | 89  |
| 90  | BINTERNET   | Information used for borrowing decisions: internet/online service                                    | 0.25 | 90  |
| 91  | TFBMUTF     | amount in tax-free bond mutual funds, 2013 dollars                                                   | 0.22 | 91  |
| 92  | NTRAD       | number of trades per year                                                                            | 0.20 | 92  |
| 93  | OTHER       | Why no checking account: other                                                                       | 0.19 | 93  |
| 94  | KGINC       | Capital gain or loss income, 2013 dollars                                                            | 0.18 | 94  |
| 95  | HCDS        | Do you have any certificates of deposit                                                              | 0.18 | 95  |
| 96  | FUTPEN      | future pensions (accumulated in an account for the R/S), 2013 dollars                                | 0.16 | 96  |
| 97  | CKOTHCHOOSE | Why chose main checking account institution: other reason                                            | 0.14 | 97  |
| 98  | CKPERSONAL  | Why chose main checking account institution: personal relationship                                   | 0.08 | 98  |
| 99  | MMMF        | money market mutual funds, 2013 dollars                                                              | 0.02 | 99  |
| 100 | HCALL       | Do you have any call accounts at brokerages                                                          | 0.00 | 100 |
| 101 | OBMUTF      | amount in other bond mutual funds, 2013 dollars                                                      | 0.00 | 101 |
| 102 | GBMUTF      | amount in government bond mutual funds, 2013 dollars                                                 | 0.00 | 102 |
| 103 | GOVTBND     | US government and government agency bonds and bills, 2013 dollars                                    | 0.00 | 103 |
| 104 | OBND        | corporate and foreign bonds , 2013 dollars                                                           | 0.00 | 104 |
| 105 | NOTXBND     | tax-exempt bonds (state and local bonds), 2013 dollars                                               | 0.00 | 105 |
| 106 | MORTBND     | mortgage-backed bonds, 2013 dollars                                                                  | 0.00 | 106 |

**Table 2.** The selected variables by NAP method.

| Number | Selected Variables | Description                                                                                              |
|--------|--------------------|----------------------------------------------------------------------------------------------------------|
| 1      | AGE                | Age of head of household                                                                                 |
| 2      | BFINPLAN           | Information used for borrowing decisions: lawyer, accountant, financial planner                          |
| 3      | EDN_INST           | Total value of education loans held by household, 2013 dollars                                           |
| 4      | EHPAY              | Have any expected payment?                                                                               |
| 5      | HFIN               | Have financial assets?                                                                                   |
| 6      | HNFIN              | Have any nonfinancial assets?                                                                            |
| 7      | HVEHIC             | Have vehicles?                                                                                           |
| 8      | LEVRATIO           | Ratio of total debt to total assets                                                                      |
| 9      | NETWORTH           | Total net worth of household, 2013 dollars                                                               |
| 10     | NLEASE             | Number of leased vehicles                                                                                |
| 11     | OTHFIN             | Total value of other financial assets, 2013 dollars                                                      |
| 12     | PAYPEN1            | Payments on loan against first pension plan not previously reported, 2013 dollars                        |
| 13     | PLOAN4             | Total value of aggregate loan balance by loan purpose: goods and services, 2013 dollars                  |
| 14     | RETQLIQ            | Total value of quasi-liquid held by household, 2013 dollars                                              |
| 15     | TPAY               | Total value of monthly debt payments, 2013 dollars                                                       |
| 16     | WSAVED             | Spent more/same/less than income in past year                                                            |
| 17     | AGECL              | Age of the household head, and categorical variable                                                      |
| 18     | BNKRUPLAST5        | Household has declared bankruptcy in the past 5 years                                                    |
| 19     | EDUC               | Education of the household's head                                                                        |
| 20     | FEARDENIAL         | Household feared being denied credit in the past 5 years                                                 |
| 21     | HHOUSES            | Have owned principal residence                                                                           |
| 22     | HODEBT             | Have any other debts                                                                                     |
| 23     | INCOME             | Total amount of income of household, 2013 dollars                                                        |
| 24     | LIQ                | Total value of all types of transactions accounts, 2013 dollars                                          |
| 25     | NFIN               | Total value of nonfinancial assets held by household, 2013 dollars                                       |
| 26     | NWCAT              | Net worth percentile groups                                                                              |
| 27     | OWN                | Have an owned vehicle                                                                                    |
| 28     | PENNUM             | Number of pension plan not previously reported                                                           |
| 29     | PLOAN6             | Total value of aggregate loan balance by loan purpose: education and professional expenses, 2013 dollars |
| 30     | REVPAY             | Total monthly revolving debt payments, 2013 dollars                                                      |
| 31     | TURNDOWN           | Household has been turned down for credit in the past 5 years                                            |
| 32     | ANYPEN             | Pension exists for either head of household or spouse                                                    |
| 33     | CONSPAY            | Total monthly consumer debt payments, 2013 dollars                                                       |
| 34     | EDUNUM             | Number of education loan                                                                                 |
| 35     | FIN                | Total value of financial assets held by household, 2013 dollars                                          |
| 36     | HINSTALL           | Have Installment loan                                                                                    |
| 37     | HOMEEQ             | Total value of equity in primary residence of household, 2013 dollars                                    |
| 38     | INCPCTLECAT        | Alternate income percentile groups                                                                       |
| 39     | LLOAN10            | Total balance of household loans where the lender is a store and/or a credit card, 2013 dollars          |

|    |            |                                                                                             |
|----|------------|---------------------------------------------------------------------------------------------|
| 40 | NHNFIN     | Total nonfinancial assets excluding principal residences, 2013 dollars                      |
| 41 | NWPCTLECAT | Alternate net worth percentile groups                                                       |
| 42 | PAYEDU3    | Payments on third education loan, 2013 dollars                                              |
| 43 | PIRCONS    | Ratio of monthly non-mortgage non-revolving consumer debt payments to monthly income        |
| 44 | PURCH1     | First lien on primary residence used for purchase of primary residence                      |
| 45 | SAVED      | Indicator of whether the household saved over the past 12 months                            |
| 46 | TURNFEAR   | Household has been turned down for credit or feared being denied credit in the past 5 years |
| 47 | ASSET      | Total value of assets held by household, 2013 dollars                                       |
| 48 | DCPLANCJ   | Either head or spouse/partner has any type of account-based plan on a current job           |
| 49 | EDUPAY     | Total payment of education loan                                                             |
| 50 | HCHECK     | Have checking account                                                                       |
| 51 | HLIQ       | Household has any checking, savings, money market or call accounts                          |
| 52 | HOUSECL    | Home-ownership category of household                                                        |
| 53 | INSTUTION  | Total balance of household loans from the lending institutions                              |
| 54 | LLOAN7     | Total balance of household loans where the lender is an individual, 2013 dollars            |
| 55 | NINC2CAT   | Income percentile groups                                                                    |
| 56 | ODEBT      | Total value of other debts held by household, 2013 dollars                                  |
| 57 | PAYILN3    | Payments on third installment loan, 2013 dollars                                            |
| 58 | PIRMORT    | Ratio of monthly mortgage payments to monthly income                                        |
| 59 | PURPOSE    | Loan purpose                                                                                |
| 60 | SAVRES3    | Reason for saving: family                                                                   |
| 61 | VEHIC      | Total value of all vehicles held by household, 2013 dollars                                 |
| 62 | ASSETCAT   | Asset percentile groups                                                                     |
| 63 | DEBT2INC   | Ratio of total debt to total income                                                         |
| 64 | EHCHKG     | People w/o checking accounts: ever had an account?                                          |
| 65 | HEDN_INST  | Installment loans not classified elsewhere                                                  |
| 66 | HMRTHEL    | Have principal residence debt                                                               |
| 67 | HOUSES     | Total value of primary residence of household, 2013 dollars                                 |
| 68 | INTDIVINC  | Interest (taxable and nontaxable) and dividend income, 2013 dollars                         |
| 69 | LLOAN8     | Total balance of household loans where the lender is an other nonfinancial, 2013 dollars    |
| 70 | NINCCAT    | Normal income percentile groups                                                             |
| 71 | OTH_INST   | Total value of other installment loans held by household, 2013 dollars                      |
| 72 | PAYORE2    | Payments on second other residential property, 2013 dollars                                 |
| 73 | PLOAN2     | Total value of aggregate loan balance by loan purpose: home improvement, 2013 dollars       |
| 74 | RESDBT     | Total value of debt for other residential property held by households, 2013 dollars         |
| 75 | SAVRES4    | Reason for saving: home                                                                     |
| 76 | WHYNOCKG   | Reason household does not have a checking account                                           |

---
